# Supplementary material for: cGAS/STING/TBK1/IRF3 Signaling Pathway Activates BMDCs Maturation Following Mycobacterium bovis Infection
Source: PubMed Central journal article supplement (PMC6412216; doi:10.3390/ijms20040895), 2019-02-19
Supplement: ijms-20-00895-s001.pdf [file ijms-20-00895-s001.pdf]

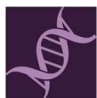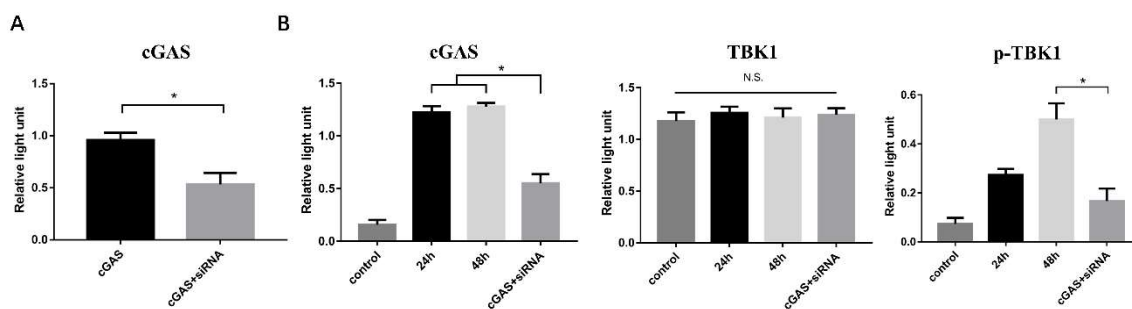

**Figure S1.** The densitometric analysis of Western blots. (A) In the absence of infection, BMDCs were treated with siRNA, and cGAS protein was analyzed by Western blotting at 24 h after treatment. (B) The cGAS, TBK1, and p-TBK1 proteins of cGAS pathway in BMDCs were analyzed in BMDCs transfected with siCon or sicGAS and then infected for 24 or 48 h with *M. bovis* (MOI 5). All data are expressed as mean  $\pm$  SD, (\*  $p < 0.05$ ; \*\*  $p < 0.01$ ; n.s.: no statistical significance).

*M. bovis*

DAPI

Merge

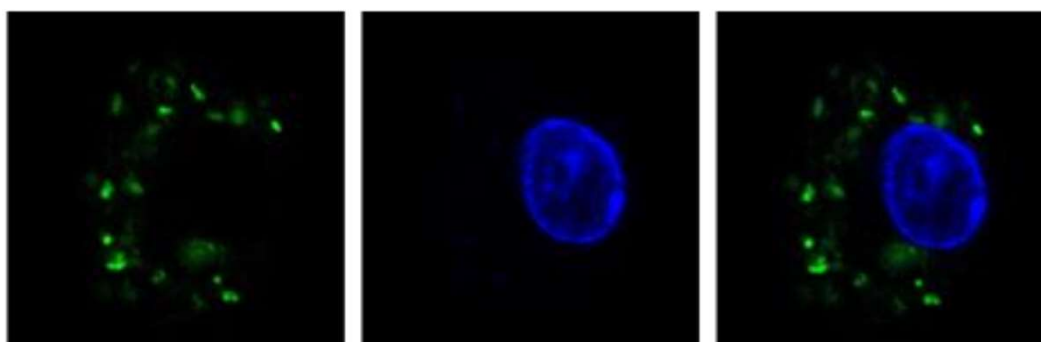

**Figure S2.** The *M. bovis* infection process of BMDCs. The co-localization of *M. bovis* and cell nucleus was detected by immunofluorescence microscopy in BMDCs.

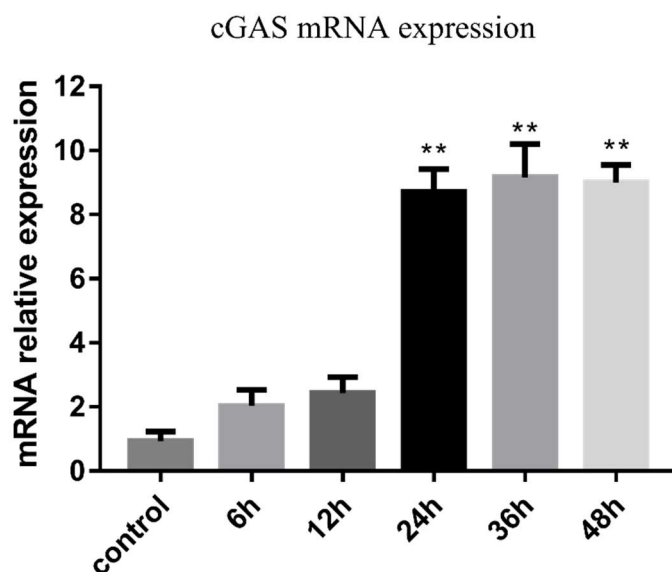

**Figure S3.** The cGAS mRNA expression of *M. bovis*-infected BMDCs in different time points. The expression of cGAS mRNA was detected by qRT-PCR after 6, 12, 24, 36, and 48 h of infection. All data are expressed as mean  $\pm$  SD, (\*  $p < 0.05$ ; \*\*  $p < 0.01$ ; n.s.: no statistical significance).

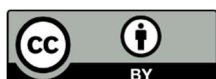

© 2019 by the authors. Submitted for possible open access publication under the terms and conditions of the Creative Commons Attribution (CC BY) license (<http://creativecommons.org/licenses/by/4.0/>).
